# Supplementary material
Source: Springer Nature journal article supplement (https://www.springermedizin.de/resource/supplementary/13075_2012_4437_MOESM9_ESM.pdf/10110406)
Supplement: MOESM9 [file 10110406]

# 1) Adaptive immunity

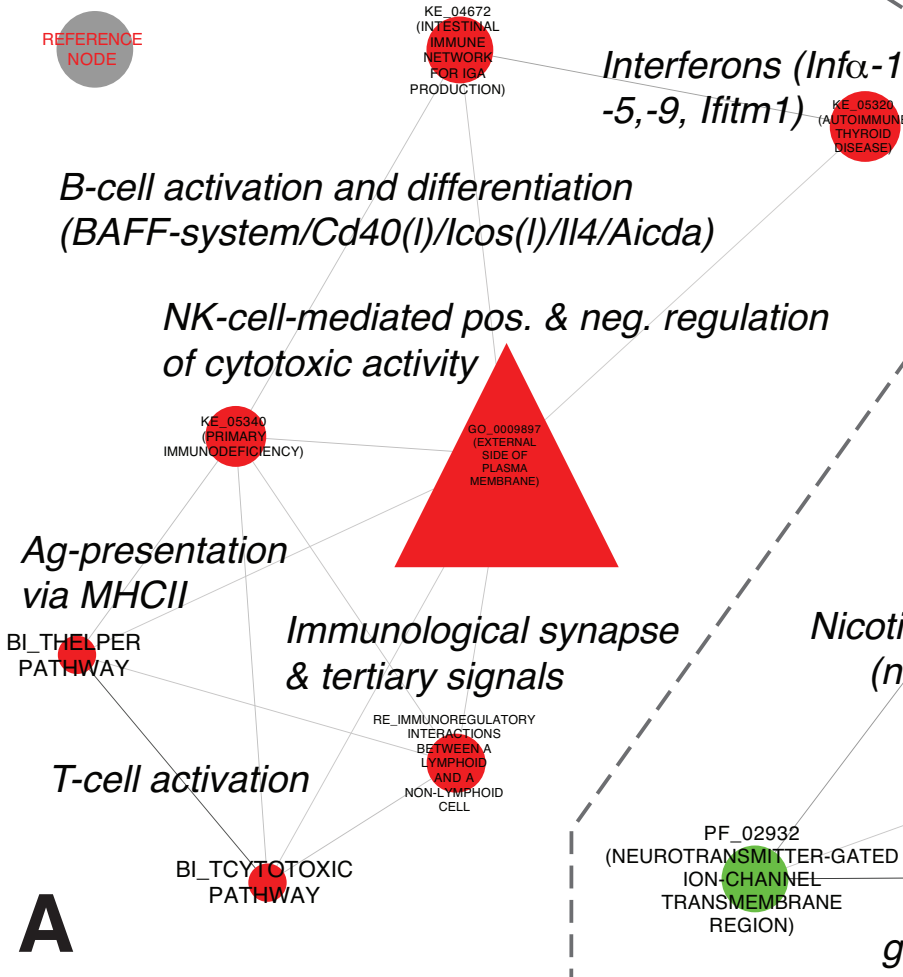

# 2) Neurotransmission (partial reversal)

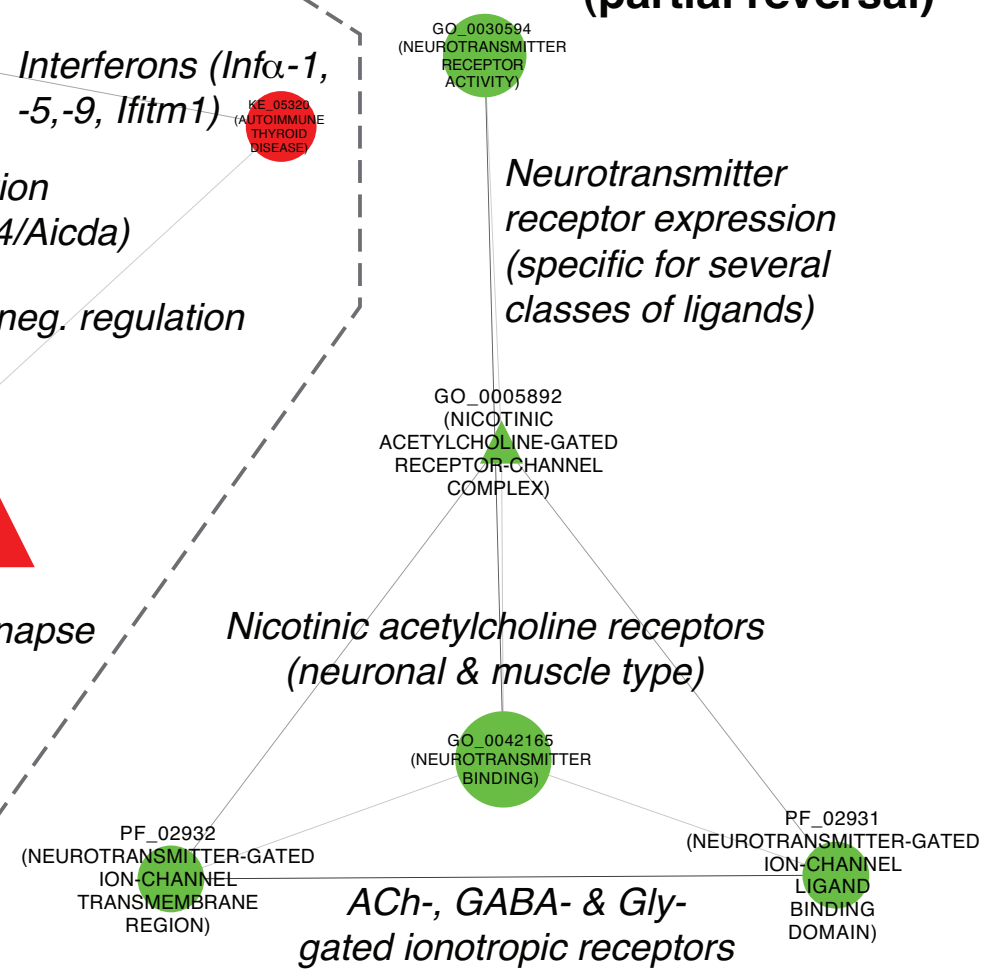

**A**

# 1) Adaptive immunity

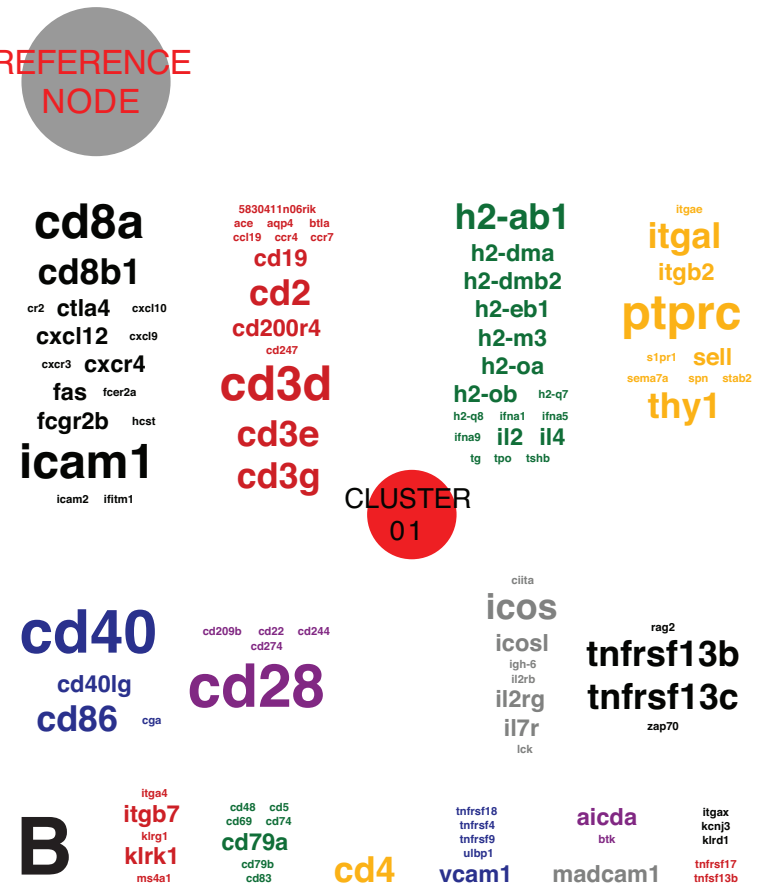

# 2) Neurotransmission (partial reversal)

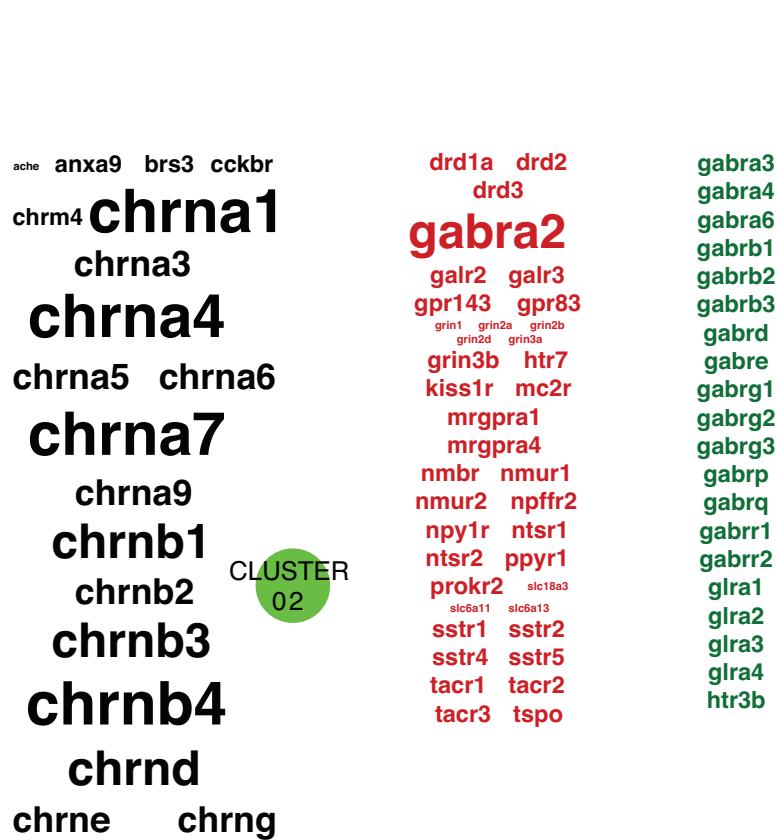

**B**
